# Supplementary material for: Inhibitory Effects of Breast Milk-Derived Lactobacillus rhamnosus Probio-M9 on Colitis-Associated Carcinogenesis by Restoration of the Gut Microbiota in a Mouse Model
Source: PubMed Central journal article supplement (PMC8065529; doi:10.3390/nu13041143), 2021-03-30
Supplement: nutrients-13-01143-s001.pdf [file nutrients-13-01143-s001.pdf]

|    |            | tumor number | averaged size (mm <sup>2</sup> ) | size (mm <sup>2</sup> ) |      |      |      |      |      |      |
|----|------------|--------------|----------------------------------|-------------------------|------|------|------|------|------|------|
| 1  | Vehicle    | 0            |                                  |                         |      |      |      |      |      |      |
| 2  | Vehicle    | 0            |                                  |                         |      |      |      |      |      |      |
| 3  | Vehicle    | 0            |                                  |                         |      |      |      |      |      |      |
| 4  | Vehicle    | 0            |                                  |                         |      |      |      |      |      |      |
| 5  | Vehicle    | 0            |                                  |                         |      |      |      |      |      |      |
| 6  | Vehicle    | 0            |                                  |                         |      |      |      |      |      |      |
| 7  | Vehicle    | 0            |                                  |                         |      |      |      |      |      |      |
| 8  | Vehicle    | 0            |                                  |                         |      |      |      |      |      |      |
| 9  | Vehicle    | 0            |                                  |                         |      |      |      |      |      |      |
| 10 | Vehicle    | 0            |                                  |                         |      |      |      |      |      |      |
| 1  | AOM+DSS    | 3            | 2.51                             | 2.30                    | 1.77 | 3.46 |      |      |      |      |
| 2  | AOM+DSS    | 4            | 3.18                             | 3.76                    | 2.52 | 3.59 | 2.83 |      |      |      |
| 3  | AOM+DSS    | 6            | 2.77                             | 2.50                    | 2.54 | 2.49 | 4.15 | 2.06 | 2.88 |      |
| 4  | AOM+DSS    | 5            | 3.90                             | 3.90                    | 5.33 | 2.90 | 3.49 | 3.90 |      |      |
| 5  | AOM+DSS    | 4            | 3.99                             | 2.66                    | 4.52 | 5.90 | 2.88 |      |      |      |
| 6  | AOM+DSS    | 2            | 2.48                             | 2.70                    | 2.27 |      |      |      |      |      |
| 7  | AOM+DSS    | 7            | 3.80                             | 4.90                    | 2.54 | 4.60 | 4.15 | 5.72 | 2.70 | 2.01 |
| 8  | AOM+DSS    | 2            | 4.00                             | 3.80                    | 4.20 |      |      |      |      |      |
| 9  | AOM+DSS    | 5            | 2.50                             | 1.77                    | 3.14 | 3.20 | 2.11 | 2.27 |      |      |
| 10 | AOM+DSS    | 3            | 3.93                             | 3.21                    | 3.87 | 4.70 |      |      |      |      |
| 1  | AOM+DSS+M9 | 0            |                                  |                         |      |      |      |      |      |      |
| 2  | AOM+DSS+M9 | 1            | 1.49                             | 1.49                    |      |      |      |      |      |      |
| 3  | AOM+DSS+M9 | 0            |                                  |                         |      |      |      |      |      |      |
| 4  | AOM+DSS+M9 | 1            | 1.21                             | 1.21                    |      |      |      |      |      |      |
| 5  | AOM+DSS+M9 | 2            | 2.50                             | 2.34                    | 2.65 |      |      |      |      |      |
| 6  | AOM+DSS+M9 | 0            |                                  |                         |      |      |      |      |      |      |
| 7  | AOM+DSS+M9 | 1            | 1.80                             | 1.80                    |      |      |      |      |      |      |
| 8  | AOM+DSS+M9 | 0            |                                  |                         |      |      |      |      |      |      |
| 9  | AOM+DSS+M9 | 0            |                                  |                         |      |      |      |      |      |      |
| 10 | AOM+DSS+M9 | 0            |                                  |                         |      |      |      |      |      |      |

Supplementary table S1: The number and the size of polyps are listed in the table.

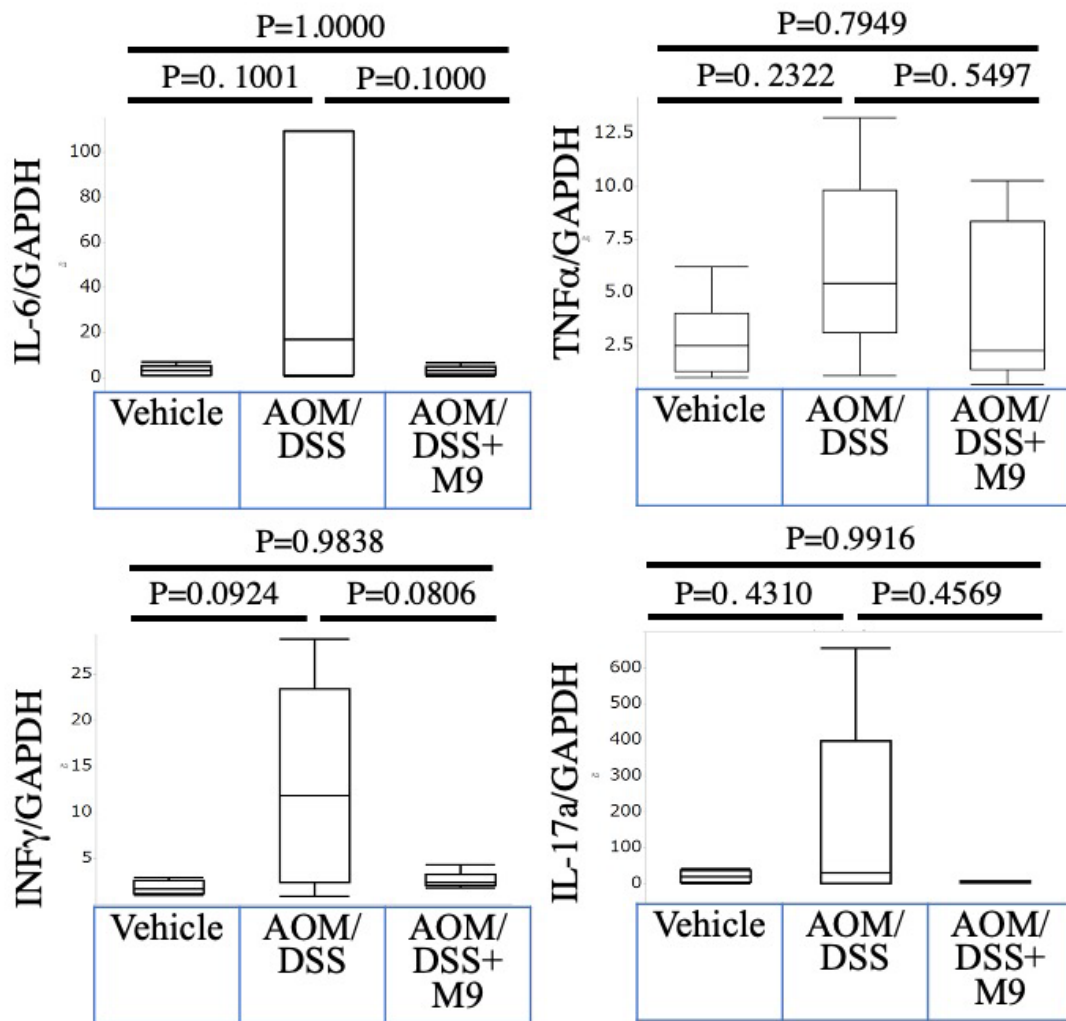

Supplementary Figure S1: Realtime RT-PCR of the cytokines IL-6, IL-17a, TNF- $\alpha$ , and INF- $\gamma$  in distal colon. (n=6) Mouse GAPDH was used as endogenous control.

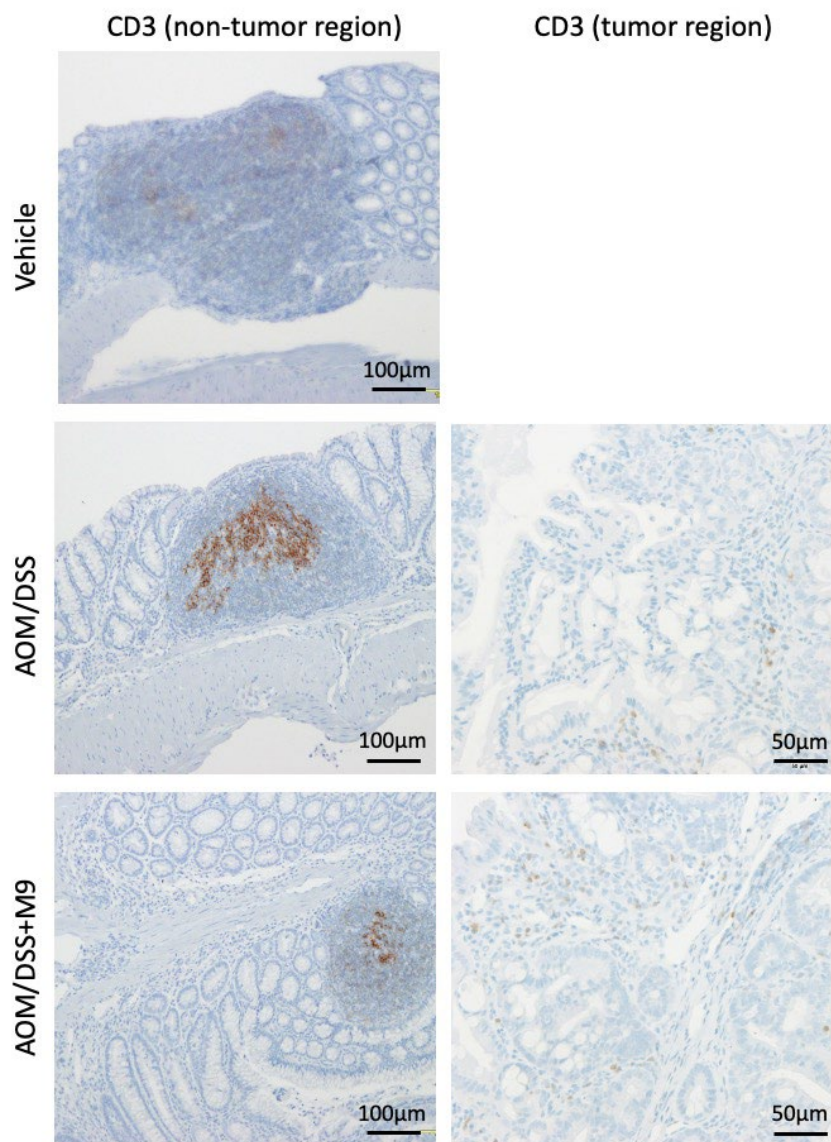

Supplementary Figure S2. Representative image of immunohistochemistry staining of CD3 in non-tumor and tumor area. The scale bar indicates 100  $\mu$  m and 50  $\mu$  m, respectively.
